# Supplementary material for: Long‐Term Imaging Evolution and Clinical Prognosis Among Patients With Acute Penetrating Aortic Ulcers: A Retrospective Observational Study
Source: PubMed Central journal article supplement — J Am Heart Assoc. 2020 Sep 6;9(18):e014505. doi: 10.1161/JAHA.119.014505 (PMC7726995; doi:10.1161/jaha.119.014505), 2020-09-06

# **SUPPLEMENTAL MATERIAL**

**Table 1. The baseline differences characteristics between with and without aortic-related adverse event in the study population (n=109).**

| Characteristic                                    | With aortic-related adverse event (n=34) | Without aortic-related adverse event (n=75) | <i>P</i> value |
|---------------------------------------------------|------------------------------------------|---------------------------------------------|----------------|
| Demographic and clinical data                     |                                          |                                             |                |
| Age, y                                            | 63.50±9.64                               | 65.99±10.25                                 | 0.235          |
| Men, n (%)                                        | 28 (82.35)                               | 59 (78.67)                                  | 0.657          |
| BMI                                               | 25.03±3.66                               | 24.93±3.16                                  | 0.883          |
| Systemic hypertension, n (%)                      | 28 (82.35)                               | 60 (80.00)                                  | 0.773          |
| Smoking, n (%)                                    | 28 (82.35)                               | 50 (67.57)                                  | 0.111          |
| Hyperlipidemia, n (%)                             | 13 (38.24)                               | 23 (30.67)                                  | 0.436          |
| Diabetes, n (%)                                   | 5 (14.71)                                | 5 (6.67)                                    | 0.280          |
| Coronary heart disease, n (%)                     | 10 (29.41)                               | 27 (36.00)                                  | 0.501          |
| Imaging                                           |                                          |                                             |                |
| Mean number of penetrating atherosclerotic ulcers | 1.06±0.34                                | 1.19±0.43                                   | 0.099          |
| Aortic arch, n (%)                                | 8 (23.53)                                | 25 (33.33)                                  | 0.302          |
| Descending thoracic aorta, n (%)                  | 25 (73.53)                               | 47 (62.67)                                  | 0.267          |
| Abdominal aorta, n (%)                            | 1 (2.94)                                 | 3 (4.00)                                    | 1.000          |
| Mean ulcer diameter, mm                           | 13.27±5.18                               | 10.42±5.35                                  | 0.010          |
| Mean ulcer depth, mm                              | 9.91±5.13                                | 7.42±3.99                                   | 0.007          |
| Maximum ascending aorta                           | 42.42±4.71                               | 43.37±4.90                                  | 0.345          |

diameter, mm

|                          |            |            |       |
|--------------------------|------------|------------|-------|
| Maximum descending aorta | 30.53±7.09 | 30.29±4.87 | 0.859 |
|--------------------------|------------|------------|-------|

diameter, mm

|                         |            |            |       |
|-------------------------|------------|------------|-------|
| Pleural effusion, n (%) | 11 (32.35) | 22 (29.33) | 0.751 |
|-------------------------|------------|------------|-------|

|                             |          |          |       |
|-----------------------------|----------|----------|-------|
| Pericardial effusion, n (%) | 0 (0.00) | 1 (1.33) | 1.000 |
|-----------------------------|----------|----------|-------|

Medical

|                            |          |          |       |
|----------------------------|----------|----------|-------|
| Antiplatelet agents, n (%) | 2 (5.88) | 3 (4.00) | 0.646 |
|----------------------------|----------|----------|-------|

|                      |          |          |       |
|----------------------|----------|----------|-------|
| Beta-blockers, n (%) | 3 (8.82) | 5 (6.67) | 0.703 |
|----------------------|----------|----------|-------|

|                            |            |            |       |
|----------------------------|------------|------------|-------|
| Calcium antagonists, n (%) | 10 (29.41) | 25 (33.33) | 0.685 |
|----------------------------|------------|------------|-------|

|                       |          |          |       |
|-----------------------|----------|----------|-------|
| ACE inhibitors, n (%) | 0 (0.00) | 5 (6.67) | 0.322 |
|-----------------------|----------|----------|-------|

|                       |           |            |       |
|-----------------------|-----------|------------|-------|
| ARB inhibitors, n (%) | 5 (14.71) | 11 (14.67) | 1.000 |
|-----------------------|-----------|------------|-------|

|                 |          |          |       |
|-----------------|----------|----------|-------|
| Nitrates, n (%) | 1 (2.94) | 3 (4.00) | 1.000 |
|-----------------|----------|----------|-------|

|                |          |          |       |
|----------------|----------|----------|-------|
| Statins, n (%) | 1 (2.94) | 4 (5.33) | 1.000 |
|----------------|----------|----------|-------|

|                   |              |              |       |
|-------------------|--------------|--------------|-------|
| Systolic BP, mmHg | 151.03±30.55 | 149.64±20.90 | 0.783 |
|-------------------|--------------|--------------|-------|

|                    |             |             |       |
|--------------------|-------------|-------------|-------|
| Diastolic BP, mmHg | 86.38±14.61 | 85.45±12.66 | 0.736 |
|--------------------|-------------|-------------|-------|

|                 |            |             |       |
|-----------------|------------|-------------|-------|
| Heart rate, BPM | 77.29±9.57 | 79.79±10.81 | 0.251 |
|-----------------|------------|-------------|-------|

Laboratory examinations

|             |                     |                     |       |
|-------------|---------------------|---------------------|-------|
| CKMB, ng/ml | 11.00 (8.75, 14.00) | 12.00 (8.00, 16.00) | 0.593 |
|-------------|---------------------|---------------------|-------|

|                      |           |            |       |
|----------------------|-----------|------------|-------|
| TNT exception, n (%) | 9 (26.47) | 24 (32.00) | 0.560 |
|----------------------|-----------|------------|-------|

|          |                      |                      |       |
|----------|----------------------|----------------------|-------|
| ALT, U/L | 18.40 (12.93, 27.18) | 15.63 (11.60, 22.00) | 0.100 |
|----------|----------------------|----------------------|-------|

|          |                      |                      |       |
|----------|----------------------|----------------------|-------|
| AST, U/L | 19.58 (15.86, 24.01) | 17.84 (14.31, 24.39) | 0.482 |
|----------|----------------------|----------------------|-------|

|                         |            |           |       |
|-------------------------|------------|-----------|-------|
| WBC, 10 <sup>9</sup> /L | 10.67±3.43 | 9.66±2.29 | 0.121 |
|-------------------------|------------|-----------|-------|

|                           |                       |                       |       |
|---------------------------|-----------------------|-----------------------|-------|
| PLT, 10 <sup>9</sup> /L   | 237.68±135.32         | 219.31±73.24          | 0.461 |
| HG, g/L                   | 134.35±15.18          | 132.52±18.42          | 0.613 |
| BUN, mmol/L               | 6.54 (4.99, 9.59)     | 6.33 (4.96, 9.05)     | 0.537 |
| CR, μmol/L                | 78.80 (70.25, 101.30) | 84.44 (68.20, 103.00) | 0.736 |
| C-reactive protein, mg/dL | 54.02 (26.83, 88.33)  | 44.60 (15.90, 55.87)  | 0.067 |
| D-dimer, ng/ml            | 1.33 (0.68, 3.18)     | 1.61 (0.80, 2.74)     | 0.971 |

---

BMI, Body Mass Index; ACE, Angiotensin-converting Enzyme; ARB, Angiotensin Receptor Blocker; BP, Blood Pressure; CKMB, Creatine Phosphokinase-myocardial Band; TNT, Troponin-T; BNP, Brain Natriuretic Peptide; ALT, Alanine Aminotransferase; AST, Aspartate aminotransferase; WBC, White Blood Cell; PLT, Platelet Count; HG, Hemoglobin; CR, Creatinine. Data are expressed as mean±SD, medians (25<sup>th</sup> percentiles, 75<sup>th</sup> percentiles), or number (percentage).

**Figure S1. Statistical analysis protocol.**

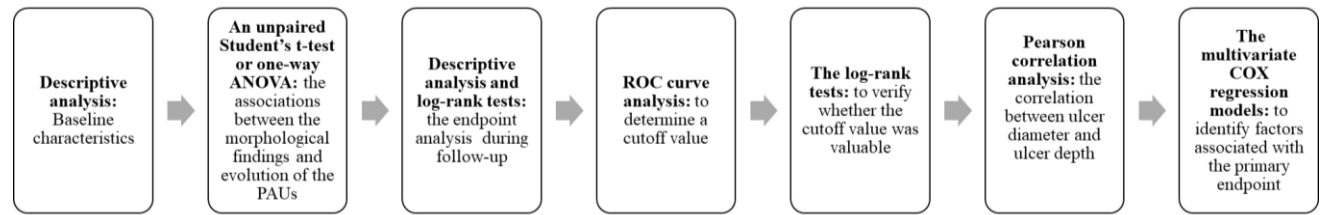

Supplement: JAH3-9-e014505-s001.pdf [file JAH3-9-e014505-s001.pdf]
